# Supplementary material for: Microfluidic fabrication of chitosan microfibers with controllable internals from tubular to peapod-like structures
Source: Royal Society of Chemistry journal article supplement (doi:10.1039/c4ra10696b), 2014-11-19
Supplement: c4ra10696b1.pdf [file c4ra10696b1.pdf]

Supplementary Material (ESI) for RSC Advances

This journal is © The Royal Society of Chemistry 2014

## Microfluidic fabrication of chitosan microfibers with controllable internals from tubular to peapod-like structures

### Supplementary Material

Xiao-Heng He,<sup>a</sup> Wei Wang,<sup>\*a</sup> Ke Deng,<sup>a</sup> Rui Xie,<sup>a</sup> Xiao-Jie Ju,<sup>a</sup> Zhuang Liu,<sup>a</sup> and Liang-Yin Chu<sup>\*a,b</sup>

<sup>a</sup> School of Chemical Engineering, Sichuan University, Chengdu, Sichuan, China

E-mail: wangwei512@scu.edu.cn (W. Wang), chuly@scu.edu.cn (L.-Y. Chu); Tel & Fax: +86 28 8546 0682

<sup>b</sup> State Key Laboratory of Polymer Materials Engineering, and Collaborative Innovation Center for Biomaterials Science and Technology, Sichuan University, Chengdu, Sichuan, China

### Microfluidic fabrication of controllable chitosan microfibers

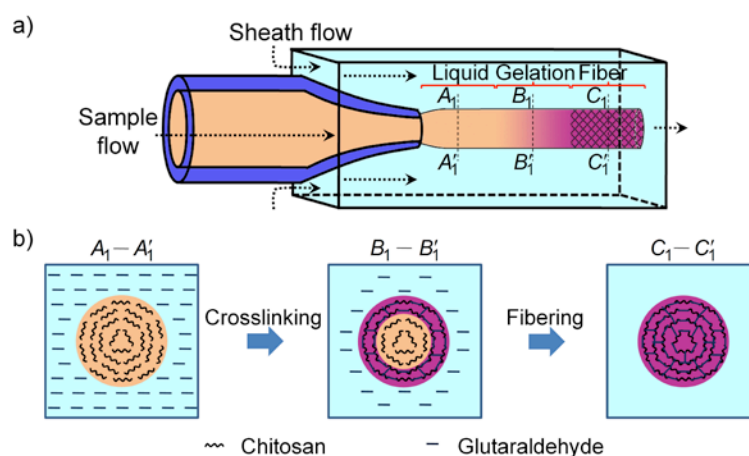

**Fig. S1** Schematic diagram of the microfluidic fabrication of solid chitosan microfiber. (a) Microfluidic device for preparing the chitosan microfiber. (b) Different cross-sections of the chitosan microfiber illustrating the crosslinking process.

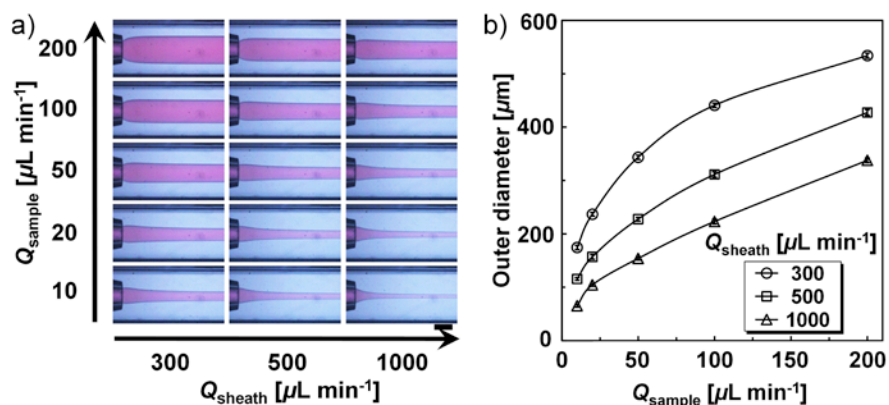

**Fig. S2** Structure control of the jet templates by changing flow rates. (a) High-speed snapshots of jet templates under different flow rate conditions. The scale bar is  $500 \mu\text{m}$ . (b) Effect of  $Q_{\text{sample}}$  and  $Q_{\text{sheath}}$  on the diameter of the jet templates.

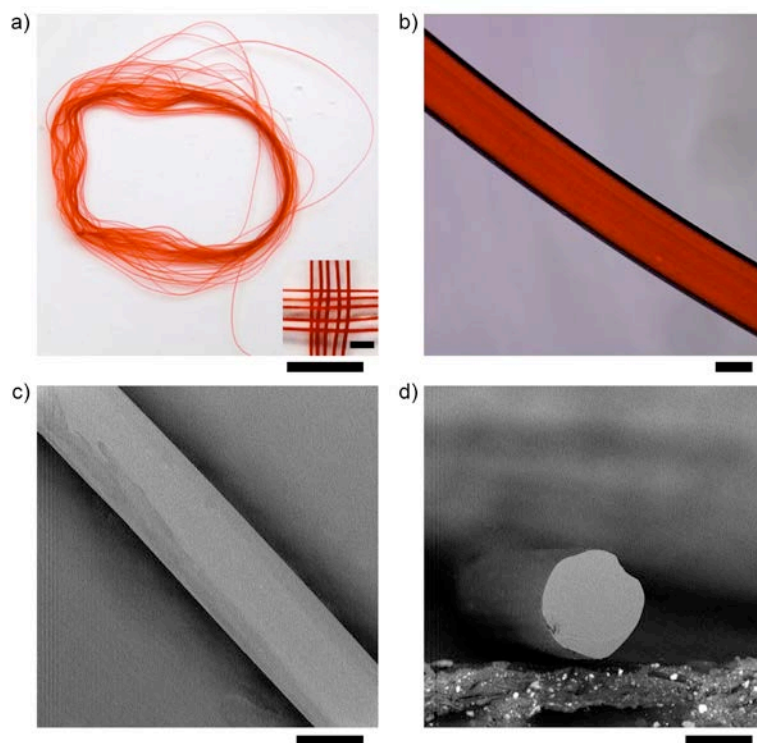

**Fig. S3** Morphological characterization of solid chitosan microfibers. (a) Digital photo of the chitosan microfibers dyed with Eosin Y. The scale bar is  $1 \text{ cm}$ . The insert picture shows a swatch of fabric that is woven from the chitosan microfibers. The scale bar is  $1 \text{ mm}$ . (b) Optical micrograph of the chitosan microfibers dyed with Eosin Y. The scale bar is  $200 \mu\text{m}$ . (c,d) SEM images of the outer surface (c) and cross-section (d) of the air-dried solid chitosan microfibers. The scale bars are  $100 \mu\text{m}$ .

**Mechanical property of chitosan microfibers**

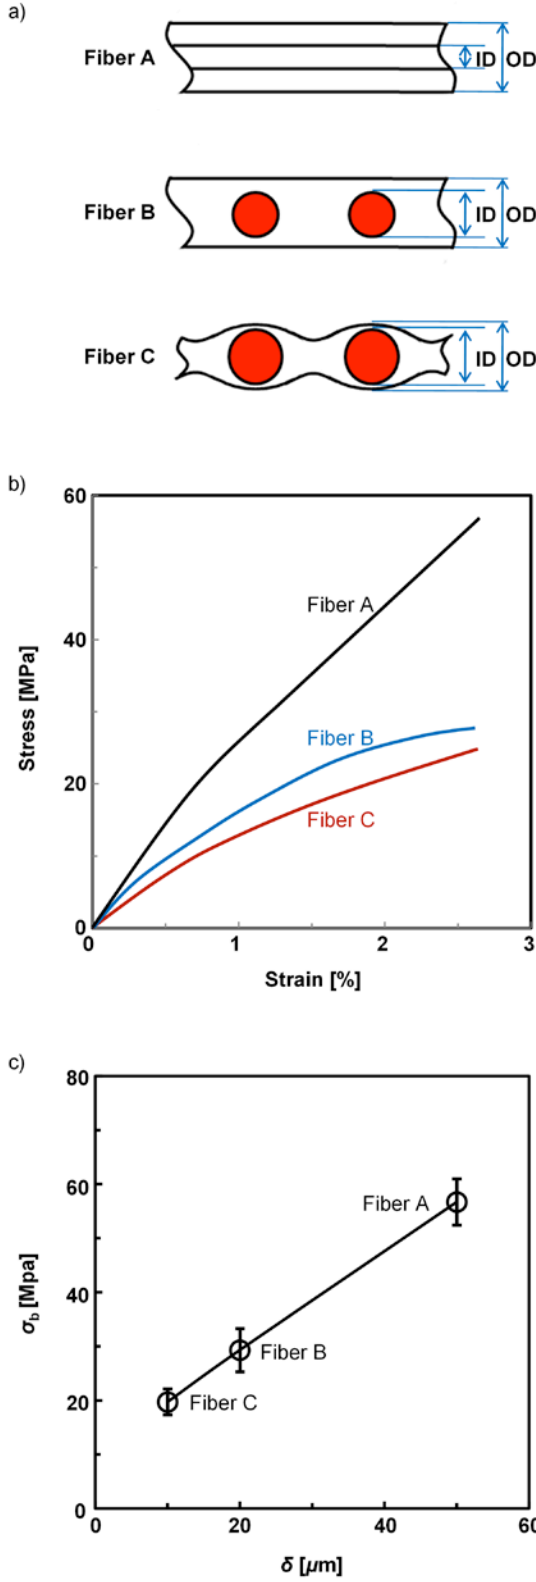

**Fig. S4** Mechanical properties of chitosan microfibers. (a) Schematic diagram showing the three types of chitosan microfibers for the mechanical property test. (b) The stress-strain curves of the three types of chitosan microfibers. (c) Effect of shell thickness ( $\delta$ ) on the tensile strength ( $\sigma_b$ ) of the chitosan microfibers.

**Table. S1** Mechanical properties of three types of chitosan microfibers

| Type | $\delta$ / $\mu\text{m}$ | $\sigma_b$ / MPa | $\varepsilon$ / % | $E$ / MPa          |
|------|--------------------------|------------------|-------------------|--------------------|
| A    | 50                       | 56.7 $\pm$ 4.3   | 2.6 $\pm$ 0.5     | 2185.4 $\pm$ 295.7 |
| B    | 20                       | 29.3 $\pm$ 4.0   | 2.5 $\pm$ 0.4     | 1362.8 $\pm$ 243.1 |
| C    | 10                       | 19.7 $\pm$ 2.4   | 2.6 $\pm$ 0.8     | 875.7 $\pm$ 127.0  |

*Note:* The symbol “ $\delta$ ” is the fiber thickness and calculated by  $(OD-ID)/2$ , “ $\sigma_b$ ” represents the tensile strength, “ $\varepsilon$ ” represents the fracture strain, and “ $E$ ” represents the Young’s modulus.
